# Supplementary material for: Real-time imaging of cancer cell generations and monitoring tumor growth using a nucleus-targeted red fluorescent probe
Source: Royal Society of Chemistry journal article supplement (doi:10.1039/c8tb00101d), 2018-01-01
Supplement: c8tb00101d1.pdf [file c8tb00101d1.pdf]

## Supporting Information

### **Real-Time Imaging of Cancer Cell Generations and Monitoring Tumor Growth using a Nucleus-Targeted Red Fluorescent Probe**

Lei Wang<sup>a</sup>, Qi Xia<sup>c</sup>, Ruiyuan Liu<sup>b,c\*</sup>, Jinqing Qu<sup>a\*</sup>

<sup>a</sup>School of Chemistry and Chemical Engineering, South China University of Technology, Guangzhou 510640, P.R.China.

<sup>b</sup>School of Biomedical Engineering, Southern Medical University, Guangzhou 510515, P.R. China.

<sup>c</sup>School of Pharmaceutical Sciences, Southern Medical University, Guangzhou 510515, P.R. China.

Corresponding authors: [cejqqqu@scut.edu.cn](mailto:cejqqqu@scut.edu.cn)

[ruiyliu@smu.edu.cn](mailto:ruiyliu@smu.edu.cn)

### **Contents**

1. Synthesis and Characterization of **PTB**.
2. <sup>1</sup>H NMR spectra of **PTB**.
3. <sup>13</sup>C NMR spectra of **PTB**.
4. IR spectra of **PTB**.
5. HRMS of **PTB**.
6. Molecular orbital amplitude plot of HOMO and LUMO energy level of **PTB**.
7. AFM imgs of DNA in the absesnce and presence of **PTB**.
8. Cell viability of **PTB** in HeLa cells and HePG-2 cells.
9. Flow cytometry profiles of HeLa cells.
10. Confocal microscopy images of HeLa cells of time-dependent laser irradiation.

## Synthesis and Characterization of PTB

The detailed synthetic route for the compound is shown in Scheme S1, as follows:

Synthesis of 4-N-propylpyridinium iodide (2): 4-N-propylpyridinium iodide was synthesized according to a previous report from the literature [S1].

Synthesis of 4,7-bis(5-formyl-2-thiophenyl)-2,1,3-benzothiadiazole (4): Compound 4 was synthesized according to a previous report from the literature [S2]. A 2 M  $\text{Cs}_2\text{CO}_3$  (16.29 g, 50 mmol in 25 mL  $\text{H}_2\text{O}$ ) solution in a 250 mL single port flask was degassed for over 20 min with  $\text{N}_2$ . Then, distilled toluene (75 mL) and Ethanol (50 mL), 5-formyl-2-thienylboronic acid (3.96 g, 25 mmol), 4,7-dibromo-2,1,3-benzothiadiazole (3 g, 10 mmol) and  $\text{PdCl}_2(\text{PPh}_3)_2$  (352 mg, 0.5 mmol) were added to the flask, which was degassed twice again. After refluxing overnight, the mixture was poured into water and extracted with chloroform 3 times, and the organic solvents were removed by a rotary evaporator. The pure product was recrystallized from  $\text{CHCl}_3$  to afford the product as a red solid (1.4 g, yield: 40%).  $^1\text{H}$  NMR (400 MHz,  $\text{CDCl}_3$ , ppm)  $\delta$ : 10.00 (s, 2H), 8.26 (d, 2H), 8.06 (s, 2H), 7.87 (d, 2H).

Synthesis of **PTB**: To a solution of 4-N-propylpyridinium iodide (2, 1.32 g, 5 mmol) were added 4,7-bis(5-formyl-2-thiophenyl)-2,1,3-benzothiadiazole (4, 0.71 g, 2 mmol) and piperidine (0.43 g, 5 mmol) in DCM/Ethanol (2/1, 75 mL). The reaction mixture was then stirred at room temperature for 24 h. The resulting mixture was filtered, and the collected solid was washed with DCM and Ethanol several times to afford the product as a dark brown solid (1.18 g, yield: 70%).  $^1\text{H}$  NMR (400 MHz,  $\text{DMSO-d}_6$ , ppm)  $\delta$ : 8.94-8.92 (d, 4H), 8.27-8.20 (dt, 10H), 7.61 (d, 2H), 7.29-7.25 (d, 2H), 4.47-4.43 (t, 4H), 1.98-1.89 (dt, 4H), 0.92-0.89 (t, 6H).  $^{13}\text{C}$  NMR (100 MHz,  $\text{DMSO-d}_6$ , ppm)  $\delta$ : 152.81, 151.83, 144.43, 142.91, 141.91, 134.04, 132.90, 129.12, 126.79,

125.29, 123.91, 122.70, 61.36, 24.38, 10.68. HRMS (MALDI-TOF):  $[M-2I]^+$  calcd for  $C_{34}H_{32}N_4S_3$ , 592.180; found, 591.917.

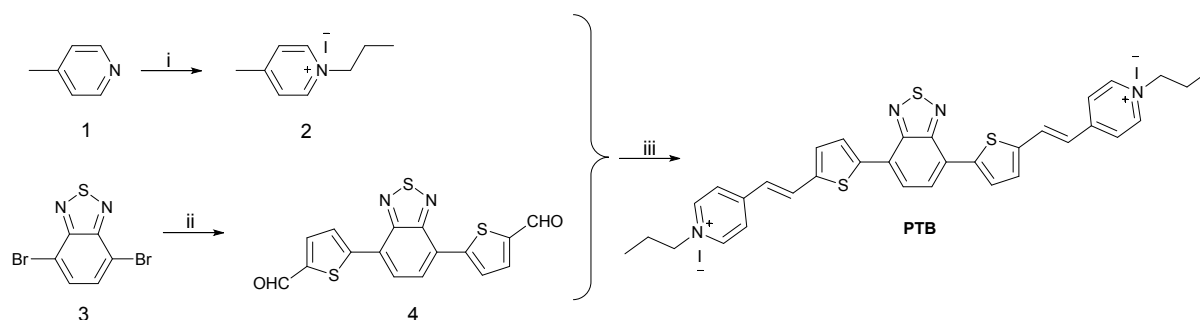Scheme S1. Synthetic route of **PTB**<sup>a</sup>.

<sup>a</sup>Reagents: (i) iodopropyl, DCM; (ii) 5-formyl-2-thienylboronic acid, PdCl<sub>2</sub>(PPh<sub>3</sub>)<sub>2</sub>, 2 M

Cs<sub>2</sub>CO<sub>3</sub>, Toluene, Ethanol; (iii) DCM, EtOH, piperidine.

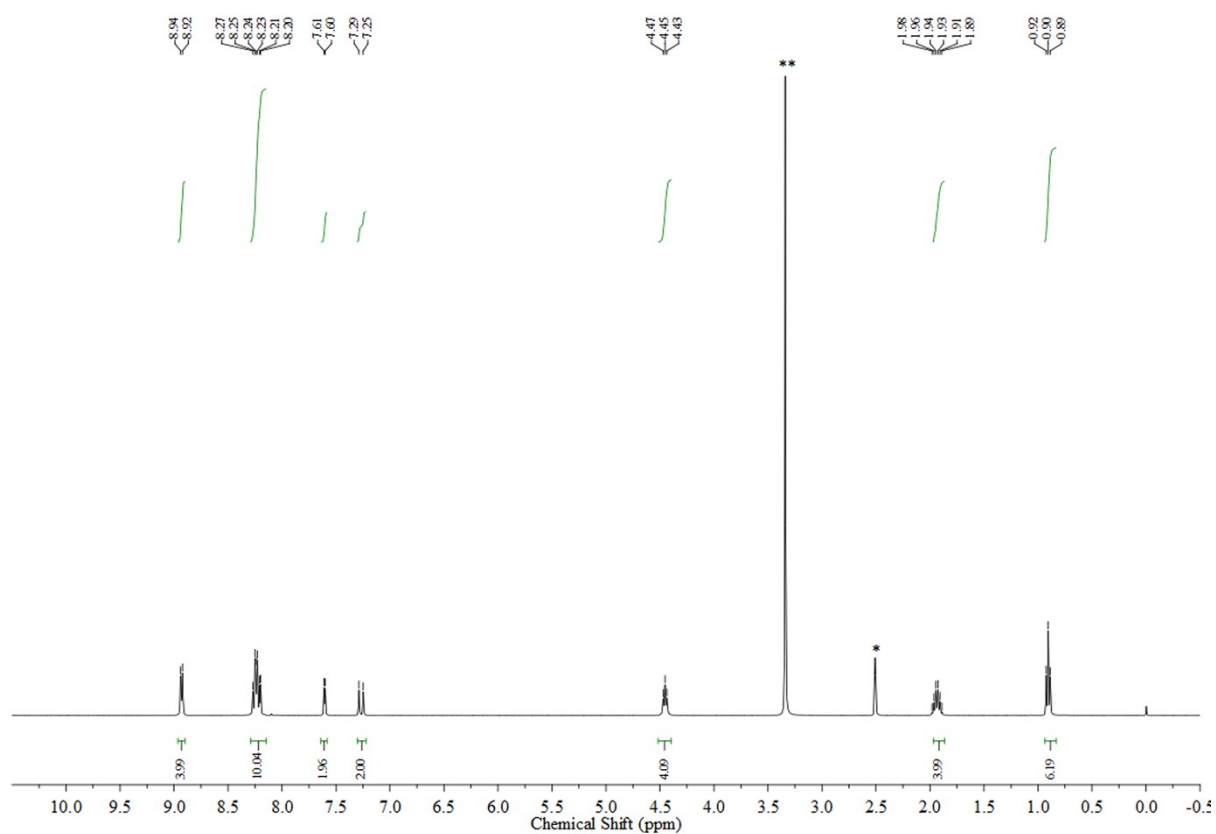

**Fig. S1.** <sup>1</sup>H NMR spectra of PTB.

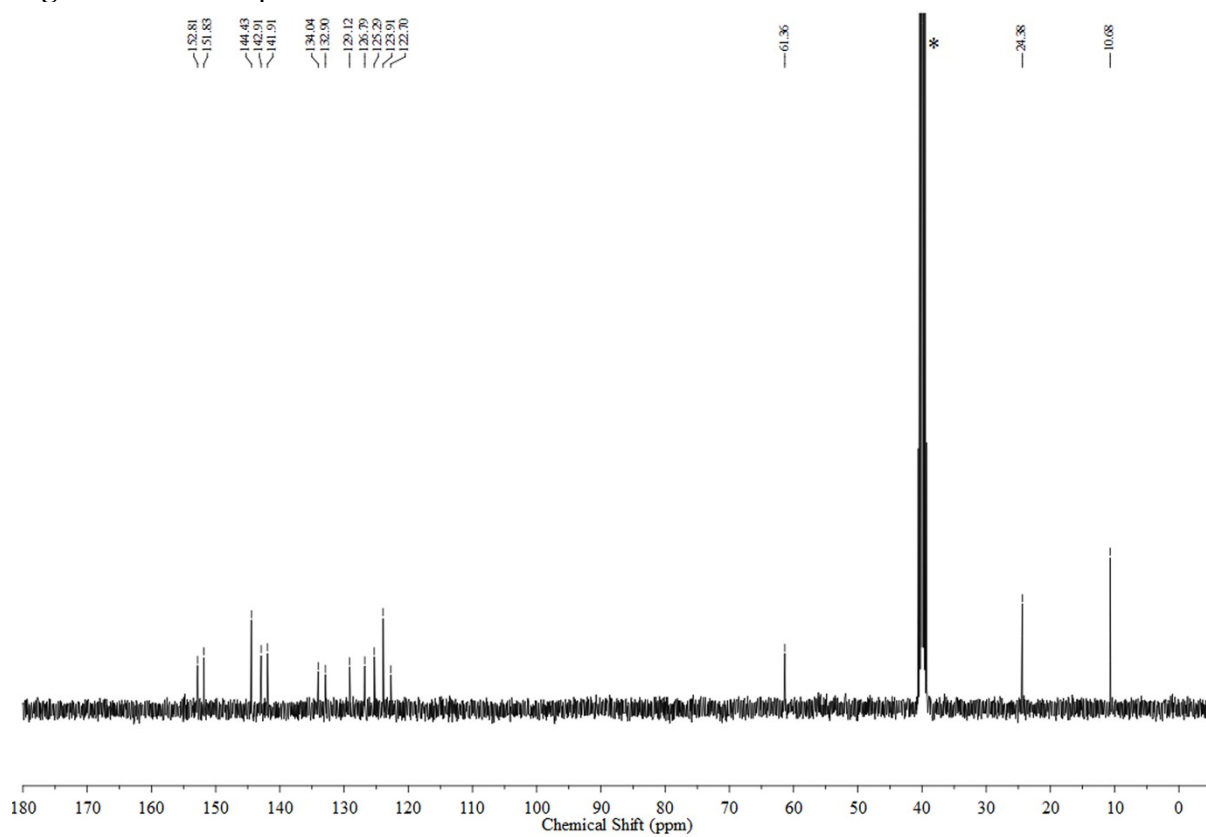

**Fig. S2.** <sup>13</sup>C NMR spectra of PTB.

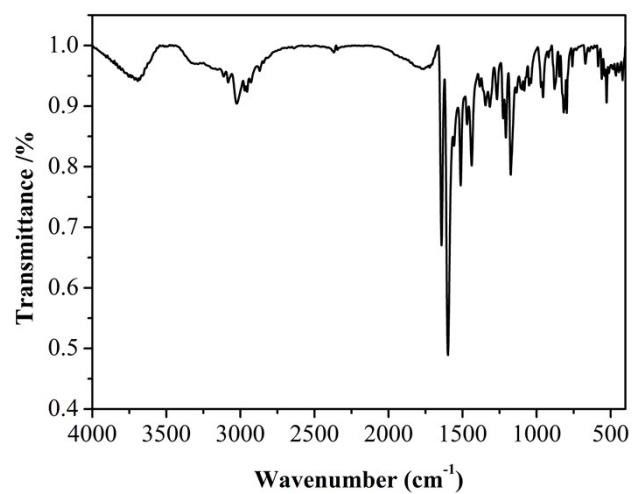

**Fig. S3.** IR spectra of **PTB**.

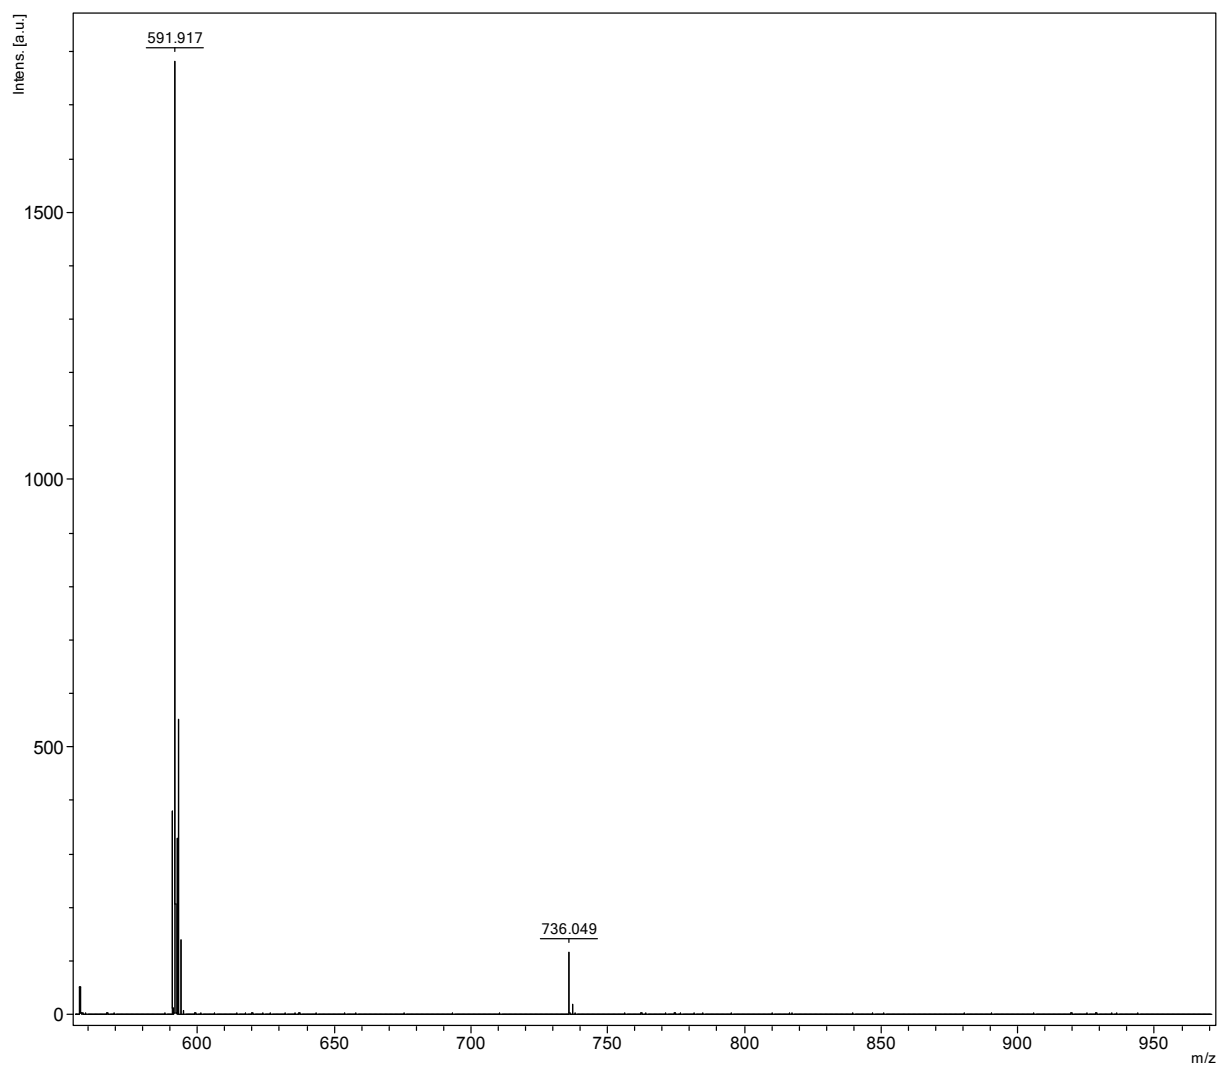

**Fig. S4.** HRMS of **PTB**.

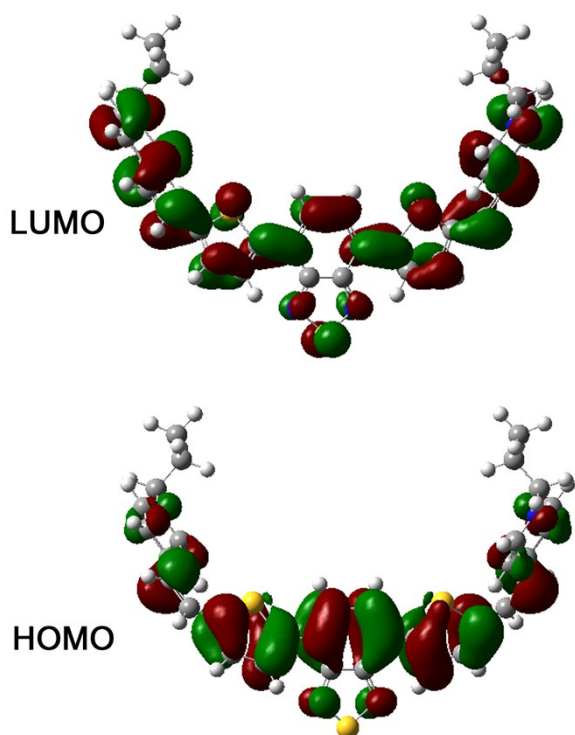

**Fig. S5.** Molecular orbital amplitude plot of HOMO and LUMO energy level of **PTB** calculated by B3LYP/6-31G (d) basis set.

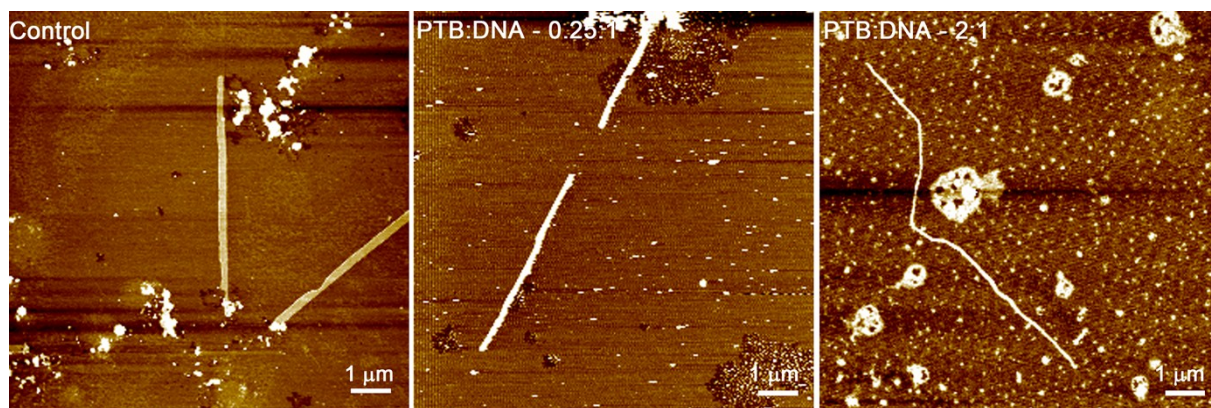

**Fig. S6.** AFM images of DNA (1 ng/ $\mu\text{L}$ ) with different **PTB** concentration ranges from 0 to 2 ng/ $\mu\text{L}$ .

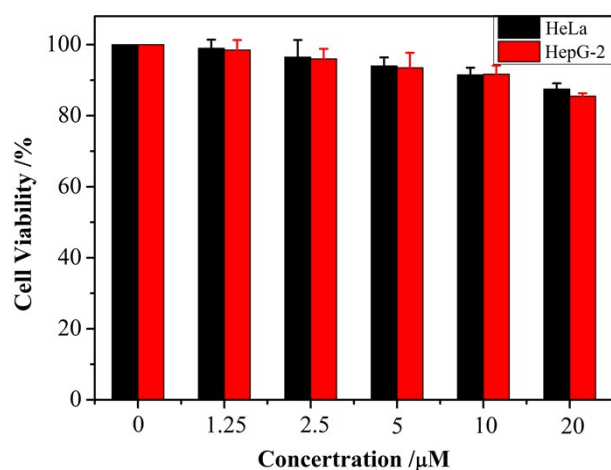

**Fig. S7.** Metabolic viability of HeLa cells and HepG-2 cells after incubation with **PTB** at different concentrations.

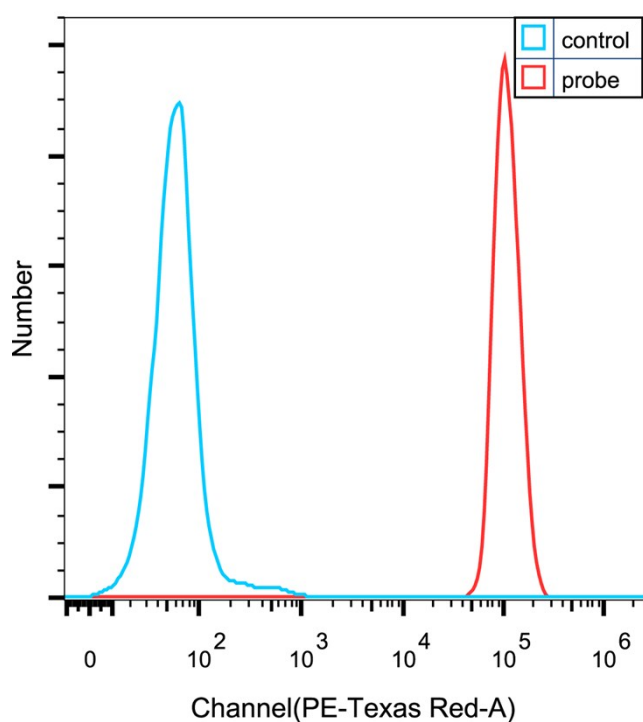

**Fig. S8.** Flow cytometry profiles of HeLa cells that were incubated with PBS or **PTB** at 37 °C for 4 h.

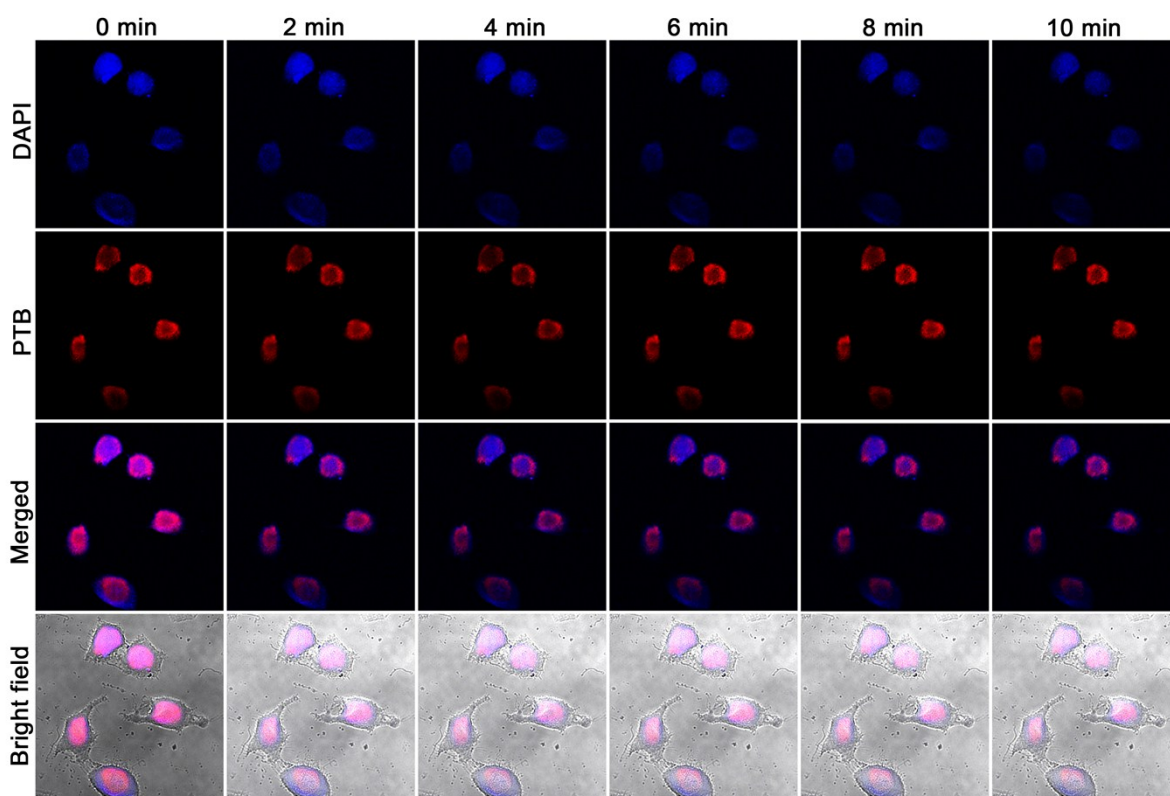

**Fig. S9.** Confocal microscopy images of HeLa cells of time-dependent laser irradiation.

Concentration: 1  $\mu$ M.

## References

- [S1] Y. Makoudi, M. E. Garah, F. Palmينو, E. Duverger and F. Cherioux, J. Phys. Chem. C., 2009, **113**, 3713-3716.
- [S2] B. Y. Fu, J. Baltazar, Z. K. Hu, A. T. Chien, S. Kumar, C. L. Henderson, D. M. Collard and E. Reichmanis, Chem. Mater. 2012, **24**, 4123-4133.
